# Supplementary material for: A highly crystalline single Au wire network as a high temperature transparent heater
Source: Royal Society of Chemistry journal article supplement (doi:10.1039/c4nr00869c), 2014-01-01
Supplement: c4nr00869c1.pdf [file c4nr00869c1.pdf]

## Electronic Supporting Information

### Highly crystalline single Au wire network as high temperature transparent heater

K. D. M. Rao and Giridhar U. Kulkarni\*

Chemistry & Physics of Materials Unit and Thematic Unit of Excellence in Nanochemistry,  
Jawaharlal Nehru Centre for Advanced Scientific Research,  
Jakkur P.O., Bangalore 560 064, India.

Fax: (+91) 80-22082766; Tel: (+91) 80-22082814.

\*Corresponding Author E-mail: [kulkarni@jncasr.ac.in](mailto:kulkarni@jncasr.ac.in)

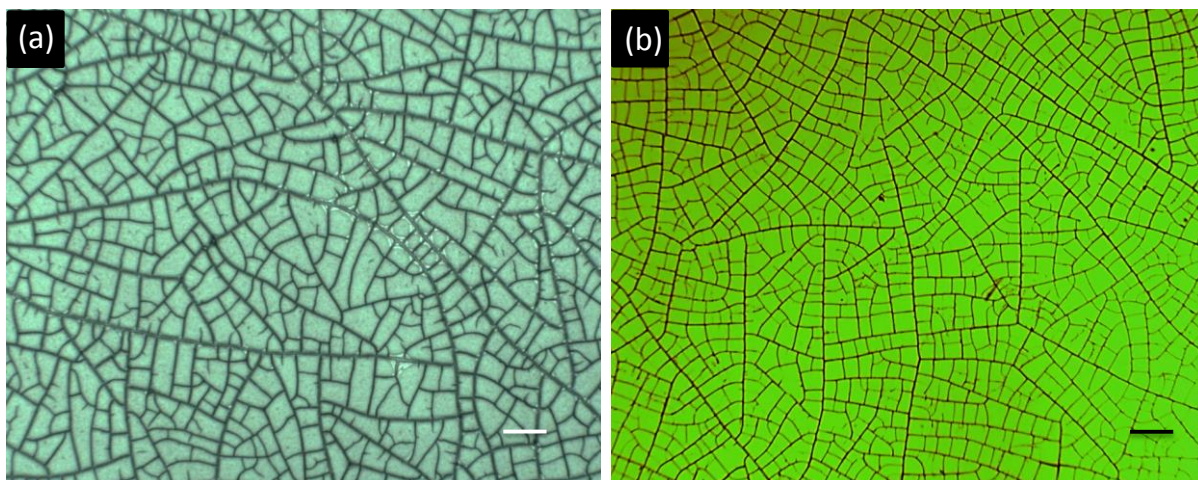

Fig. S1: Optical micrographs of a) Crackle patterns formed in acrylic resin film and (b) Single Au micro/nano wire network, after deposition of Au metal and liftoff (Scale bar 50  $\mu\text{m}$ ).

A 60  $\mu\text{l}$  of acrylic resin solution (0.4 g/ml) was drop coated on quartz and allowed to dry in air. The crackles formed spontaneously in a dried layer of acrylic resin as shown in Fig. S1. The crackles are typically few micron to sub-micron wide and are highly interconnected across the large area, crucial for metal wire network formation in the final step.

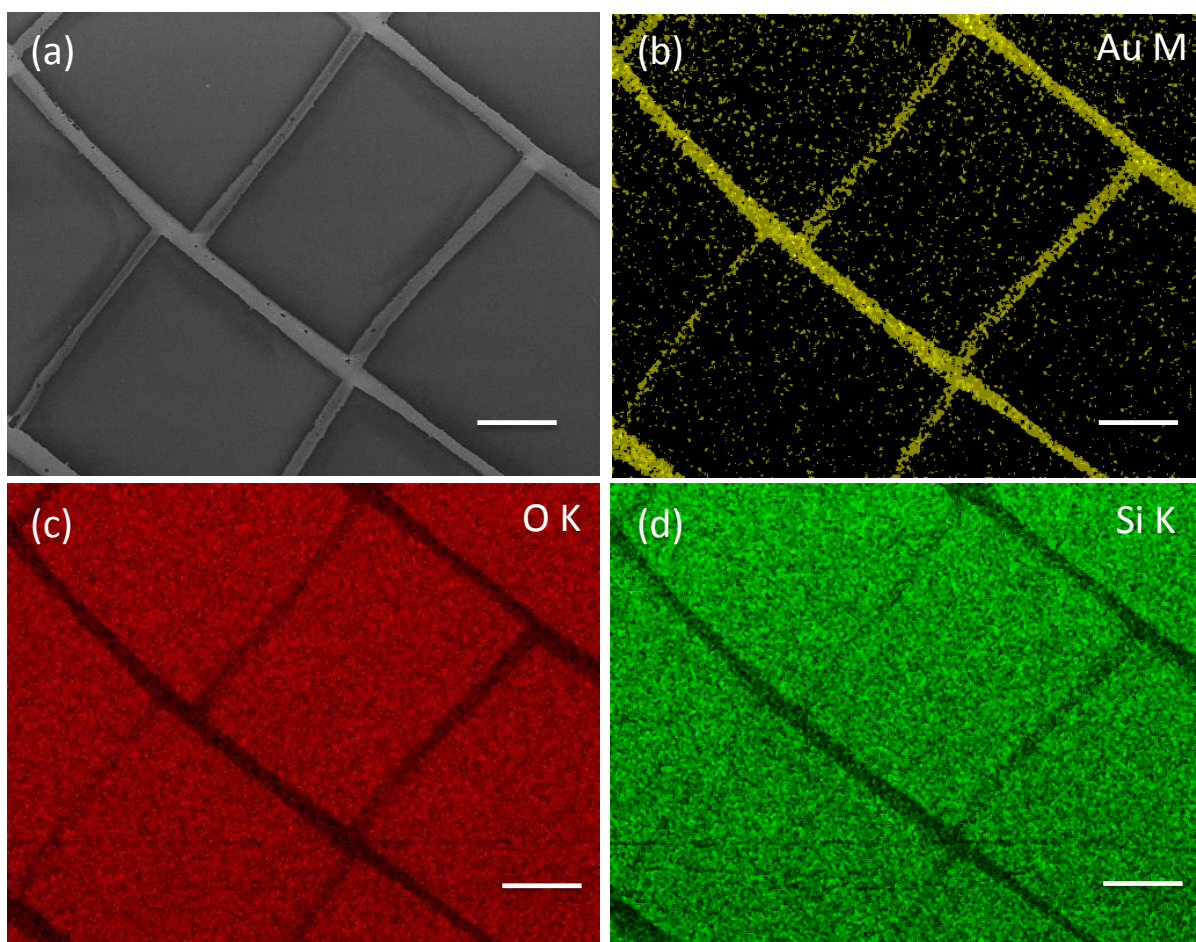

Fig. S2: (a) SEM of image of Au network on quartz substrate, EDS maps of the same region corresponding to (b) Au M, (c) O K and (d) Si K, respectively (scale bar 10  $\mu\text{m}$ ).

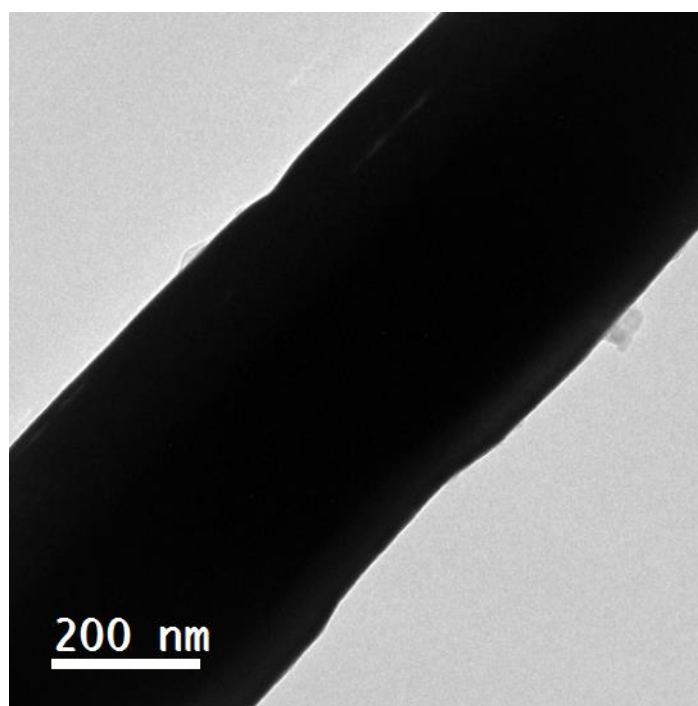

Fig. S3: Bright field TEM image of Au nanowire with width  $\sim 500$  nm.

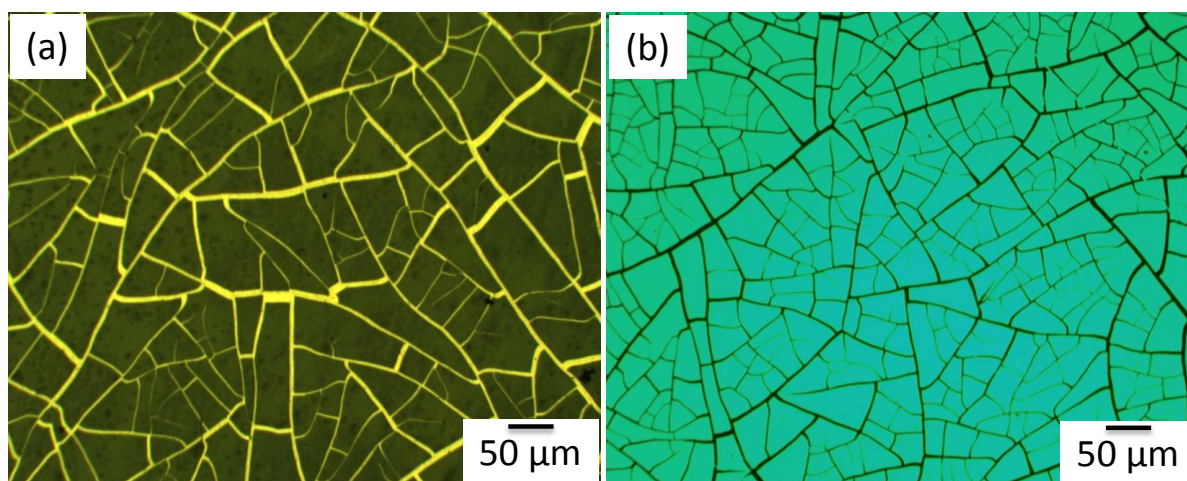

Fig. S4: Optical micrographs of (a) Au network on PET substrate (reflectance mode) and (b) Ag network on glass substrate (transmittance mode).



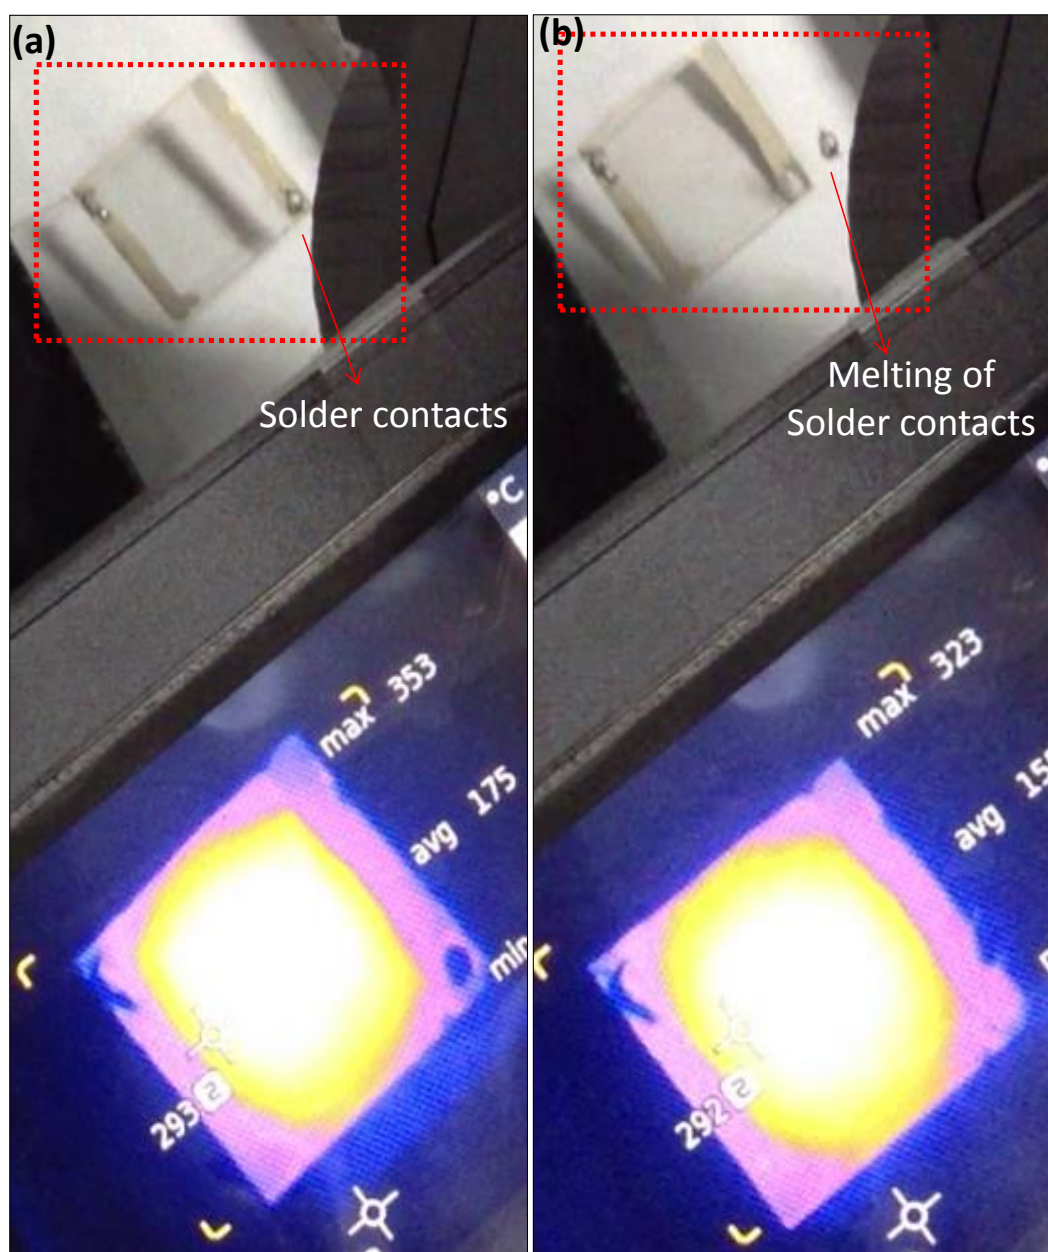

Fig. S5: Transparent heater with solder as contacts (a) before and (b) after melting of the solder. As the temperature increased the melting temperature of the solder (250 °C), the contact came off. Temperature can be read from the IR camera screen.

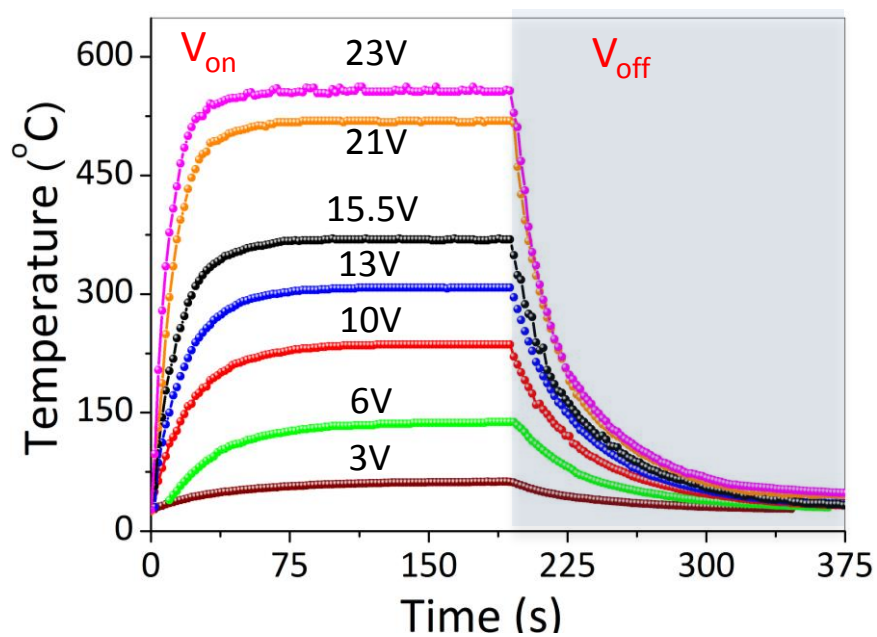

Fig. S6: Temperature profiles of Au wire network/quartz as a function of time at different applied voltages recorded using an IR camera (Au wire thickness 60 nm).

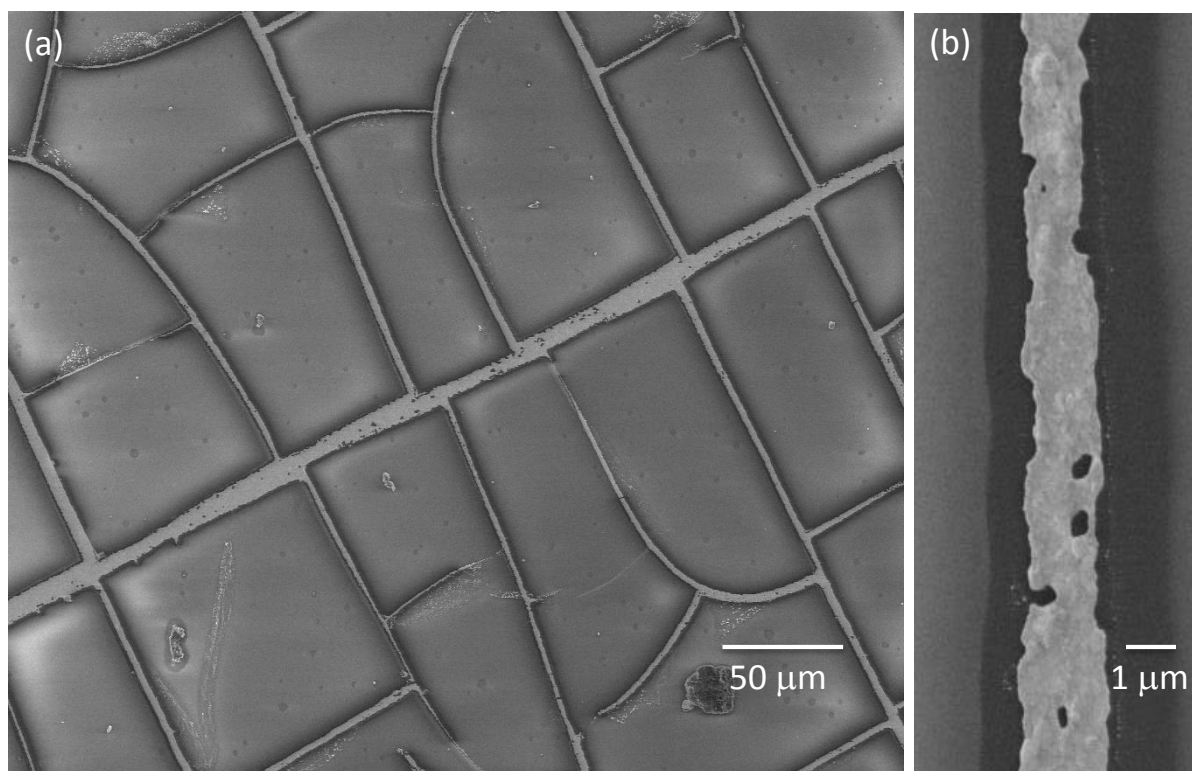

Fig. S7: (a) SEM image of damaged Au wire network after self-annealing 650 °C, (b) A magnified view showing pinholes.

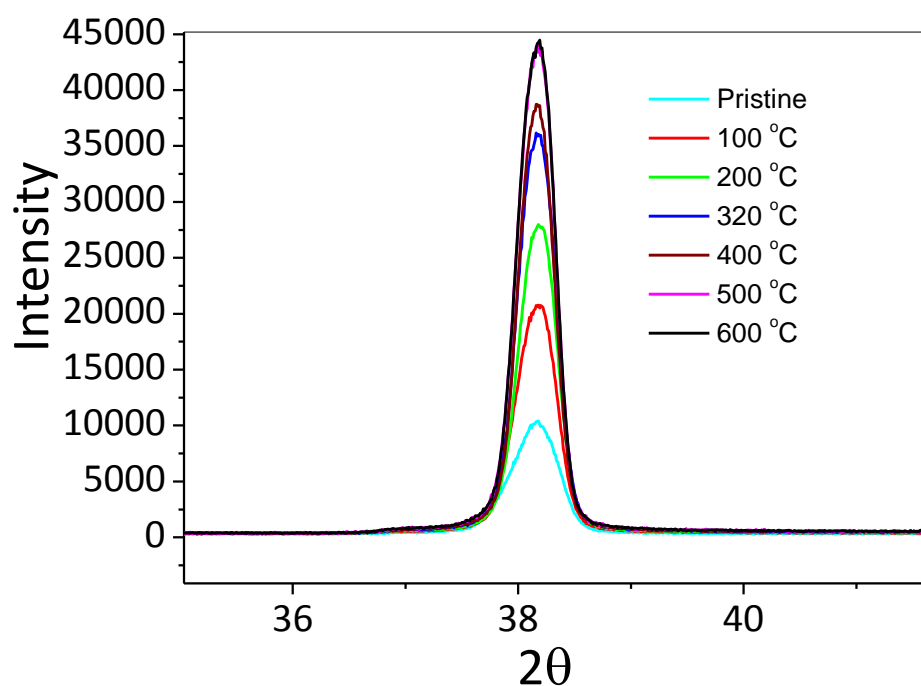

Fig. S8: XRD of Au wire network after annealing at different temperatures.

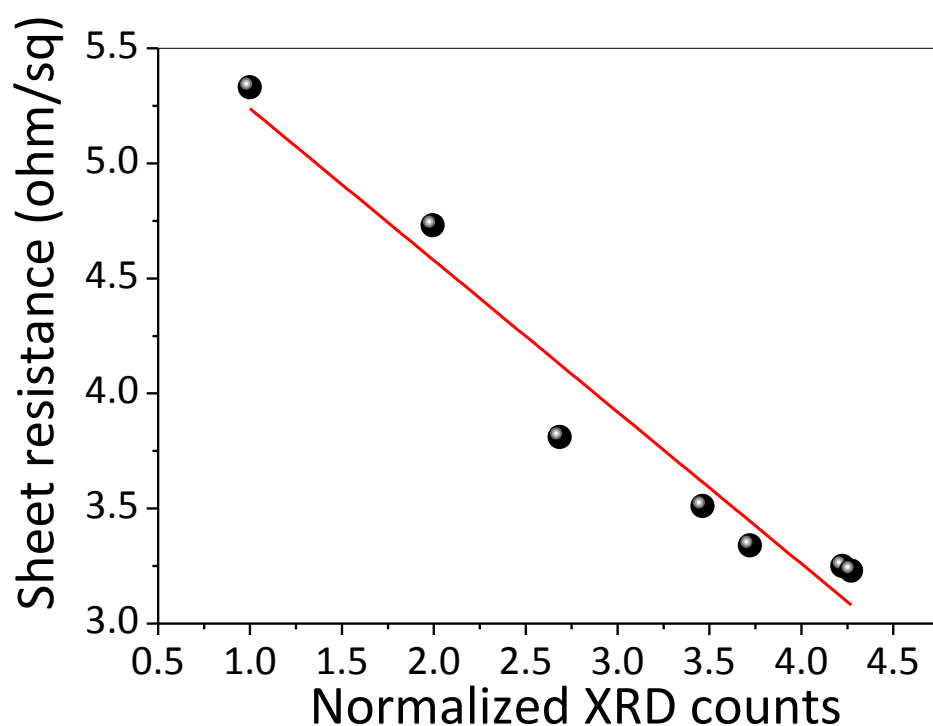

Fig. S9: Sheet resistance as a function of normalized XRD counts, solid circles are experimental data and red line is a linear fit. The reduction in the sheet resistance value is attributed to increase in the crystallinity of Au wire.

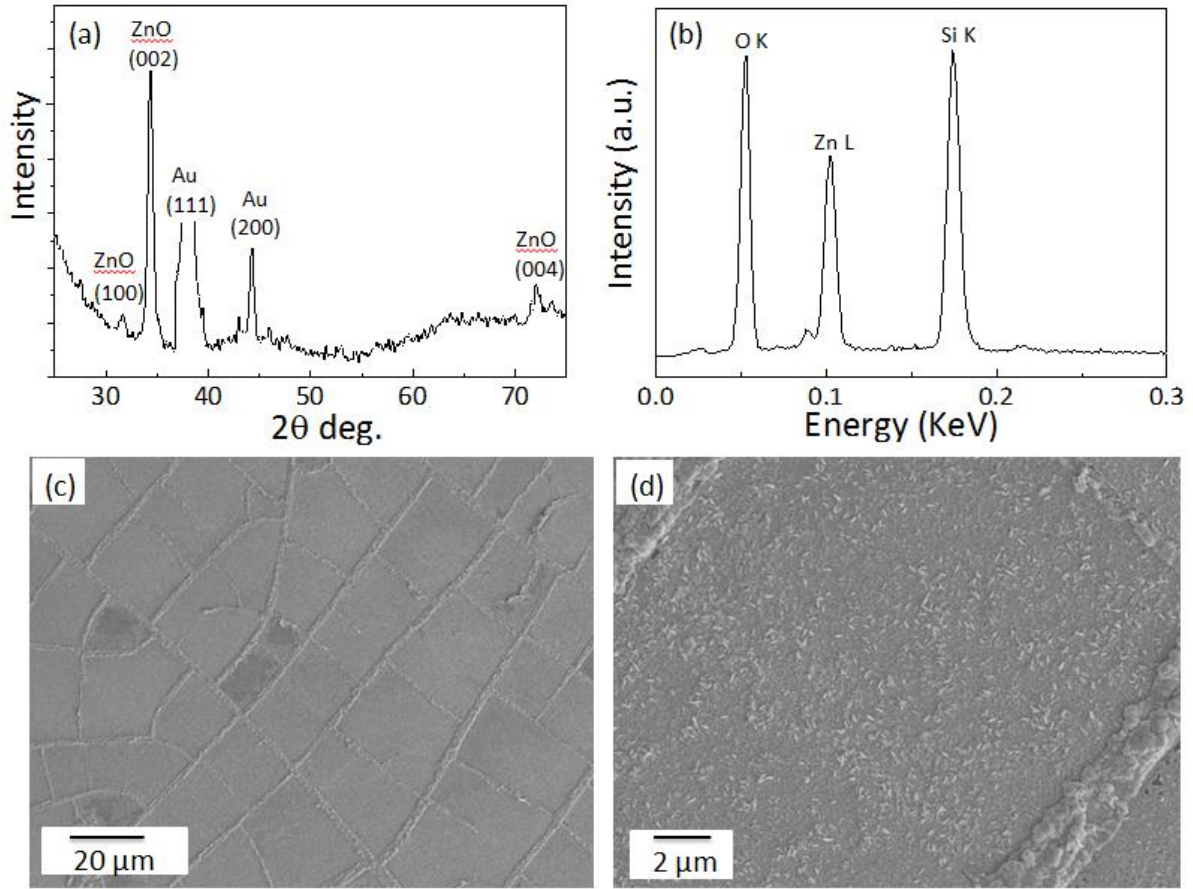

Fig. S10: ZnO thin film on Au network (HT-TCE): (a) XRD pattern and (b) EDS spectrum of ZnO obtained by oxidising Zn film in air by joule heating the Au wire HT-TCE to 450 °C for 45 min. (c) SEM image of ZnO thin film fabricated on Au network, (d) a magnified view.

In this experiment, the Au wire HT-TCE has been used as joule heater to prepare ZnO film starting with Zn film, just as an example. A Zn thin film (thickness, ~ 60nm) was deposited on the Au wire HT- TCE. By applying a bias of 9V, the HT-TCE was heated to 450 °C in air when Zn oxidation began. After 45 min, the substrate was cooled. The XRD pattern (see Fig. S10(a)) clearly demonstrates the formation of ZnO. The EDAX spectrum in Fig. S10(b)) reveals the formation of ZnO on Au wire HT-TCE. The SEM images show (see Fig. S10(c) and (d)) that the Au wires are buried beneath the ZnO thin film. The overall roughness of the Au wire TCE was found to be 60 nm for wire thickness of ~ 220 nm, which decreased to ~



30 nm after ZnO film formation. Such barrier layers are required for the fabricate of optoelectronic devices.

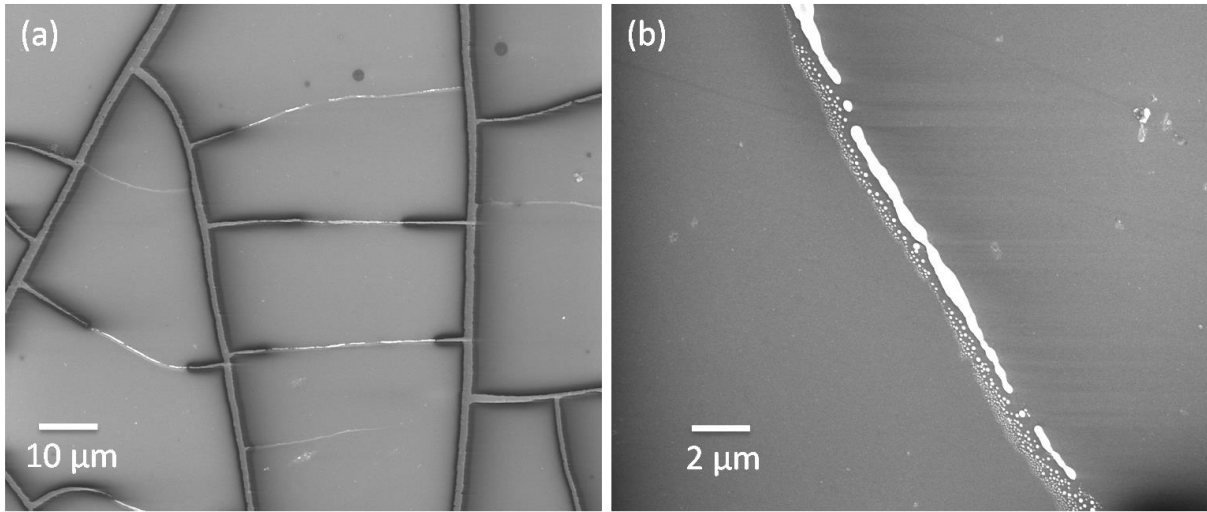

Fig. S11: (a) SEM images of externally heated Au wire network (450 °C for 30 minutes), (b) magnified view, demonstrating dewetting.

Table-S1: Summary on FOM values of Au wire network based TCEs

| S.No | Thickness of Au network (nm) | T(%) | $R_s$ ( $\Omega/\square$ ) | Figure of merit |
|------|------------------------------|------|----------------------------|-----------------|
| 1    | 60                           | 86.6 | 5.4                        | 472             |
| 2    | 220                          | 87.2 | 3.1                        | 858             |

Table S2: TCEs as transparent heaters. ITO, thin film as well as nanowire/nanotube network based TCEs from the literature compared with Au wire network/quartz from this study

| S.No | Material used          | Applied Voltage (V) | Maximum temperature achieved (°C) | Response time (s) | $R_s$ ( $\Omega \square^{-1}$ ) | Remarks                                                          | Ref           |
|------|------------------------|---------------------|-----------------------------------|-------------------|---------------------------------|------------------------------------------------------------------|---------------|
| 1    | Ag NW                  | 7                   | 55                                | 500               | 33                              | Thermal annealing is required to decrease the contact resistance | <sup>1</sup>  |
| 2.   | Ag NW                  | 7                   | 100                               | 75                | 10                              | -----                                                            | <sup>2</sup>  |
| 3.   | Graphene               | 12                  | 100                               | 75                | 43                              | Graphene is required to dope with Au                             | <sup>3</sup>  |
| 4.   | Graphene               | 12                  | 100                               | 300               | 66                              | Graphene is required to dope with Au                             | <sup>4</sup>  |
| 5.   | MWNT                   | 15                  | 75                                | ---               | 349                             | High sheet resistance                                            | <sup>5</sup>  |
| 6.   | SWNT                   | 60                  | 160                               | ---               | 139                             | Thermal heating is required                                      | <sup>6</sup>  |
| 7.   | SWNT                   | 60                  | 47                                | 60                | 2600                            | High sheet resistance                                            | <sup>7</sup>  |
| 8.   | SWNT                   | 60                  | 200                               | ~70               | 250                             | Transmittance is only 30 %                                       | <sup>8</sup>  |
| 9.   | ITO                    | 50                  | 180                               | 25                |                                 | Films are not flexible                                           | <sup>9</sup>  |
| 10   | ITO                    | 20                  | 160                               | 110               | 633                             | Sintering at 400 °C is required                                  | <sup>10</sup> |
| 11.  | Ga doped ZnO           | 42                  | 90                                | 30                | ---                             | thin films                                                       | <sup>11</sup> |
| 12.  | Ga doped ZnO           | 20                  | 160                               | 50                | ---                             | thin films                                                       | <sup>12</sup> |
| 13.  | Ag NW / SWNTs          | 15                  | 100                               | 30                | ---                             | Hybrid structures                                                | <sup>13</sup> |
| 14.  | MWNT                   | 40                  | 140                               | 30                | 172                             | 5 layers of MWNTs were used                                      | <sup>14</sup> |
| 15   | Graphene               | 60                  | 180                               | 120               | 641                             | Annealing at higher temperatures                                 | <sup>15</sup> |
| 16.  | Au wire network/quartz | 23                  | 550                               | 45                | 5.4 & 3.2                       | Au thickness = 60 nm                                             | Present work  |
|      |                        | 12                  | 600                               | 40                | 2.44 & 3.3                      | Au thickness = 220 nm                                            |               |

## References

1. Celle, C. et al. Highly flexible transparent film heaters based on random networks of silver nanowires. *Nano Research* **5**, 427-433 (2012).
2. Kim, T. et al. Uniformly Interconnected Silver-Nanowire Networks for Transparent Film Heaters. *Advanced Functional Materials* **23**, 1250-1255 (2012).
3. Kang, J. et al. High-Performance Graphene-Based Transparent Flexible Heaters. *Nano Letters* **11**, 5154-5158 (2011).
4. Bae, J.J. et al. Heat Dissipation of Transparent Graphene Defoggers. *Advanced Functional Materials* **22**, 4819-4826 (2012).
5. Jang, H.S., Jeon, S.K. & Nahm, S.H. The manufacture of a transparent film heater by spinning multi-walled carbon nanotubes. *Carbon* **49**, 111-116 (2011).
6. Kim, D., Lee, H.-C., Woo, J.Y. & Han, C.-S. Thermal Behavior of Transparent Film Heaters Made of Single-Walled Carbon Nanotubes. *The Journal of Physical Chemistry C* **114**, 5817-5821 (2010).
7. Kang, T.J., Kim, T., Seo, S.M., Park, Y.J. & Kim, Y.H. Thickness-dependent thermal resistance of a transparent glass heater with a single-walled carbon nanotube coating. *Carbon* **49**, 1087-1093 (2011).
8. Yoon, Y.H. et al. Transparent Film Heater Using Single-Walled Carbon Nanotubes. *Advanced Materials* **19**, 4284-4287 (2007).
9. Im, K., Cho, K., Kwak, K., Kim, J. & Kim, S. Flexible Transparent Heaters with Heating Films Made of Indium Tin Oxide Nanoparticles. *Journal of Nanoscience and Nanotechnology* **13**, 3519-3521 (2013).
10. Im, K., Cho, K., Kim, J. & Kim, S. Transparent heaters based on solution-processed indium tin oxide nanoparticles. *Thin Solid Films* **518**, 3960-3963 (2012).
11. Kim, J.H. et al. Heat generation properties of Ga doped ZnO thin films prepared by rf-magnetron sputtering for transparent heaters. *Thin Solid Films* **516**, 1330-1333 (2008).
12. Ahn, B.D. et al. Transparent Ga-doped zinc oxide-based window heaters fabricated by pulsed laser deposition. *Journal of Crystal Growth* **310**, 3303-3307 (2008).
13. Kim, D. et al. Transparent flexible heater based on hybrid of carbon nanotubes and silver nanowires. *Carbon* **63**, 530-536 (2013).
14. Jung, D., Kim, D., Lee, K.H., Overzet, L.J. & Lee, G.S. Transparent film heaters using multi-walled carbon nanotube sheets. *Sensors and Actuators A: Physical* **199**, 176-180 (2013).
15. Sui, D. et al. Flexible and Transparent Electrothermal Film Heaters Based on Graphene Materials. *Small* **7**, 3186-3192 (2011).

**Movie S1:** Soldering lead melting using transparent heater
